# Supplementary material for: Training the Concept of Innovate in Dolphins (Tursiops truncatus) Is Both Creative and Cognitively Stimulating
Source: MDPI journal article supplement (doi:10.3390/ani14060896), 2024-03-14

Supplemental Figures for Yeater et al.

The graphical representations of each construct are provided for each dolphin in this supplemental file.

Fluency

**Figure S1.** Percent correct per session per dolphin.

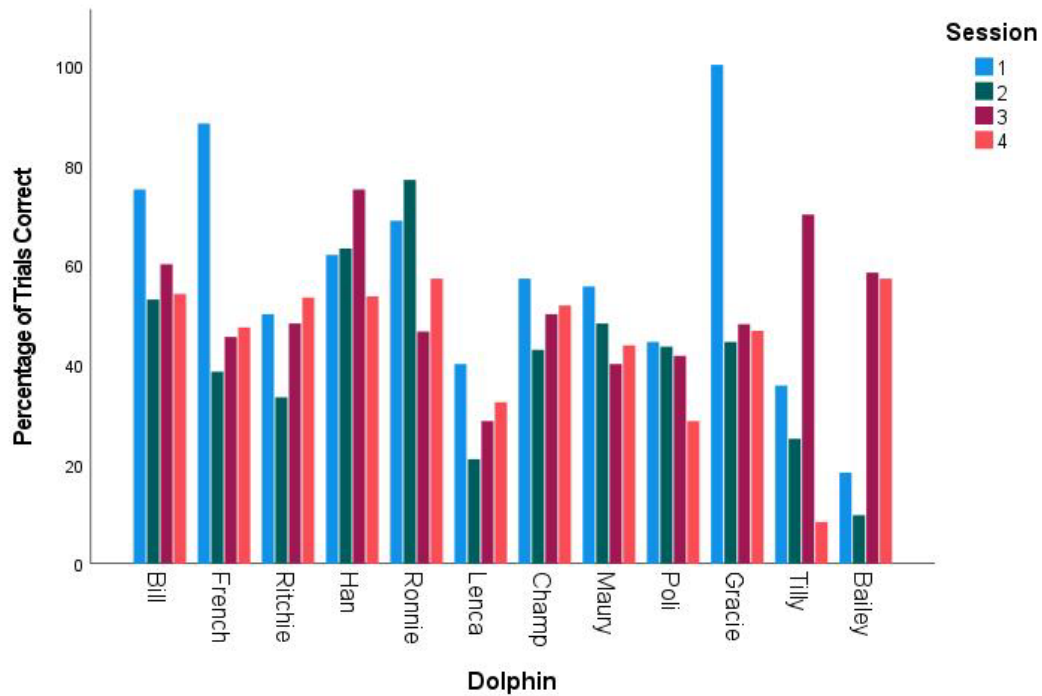

**Figure S2.** Number of trials correct before repeat per session.

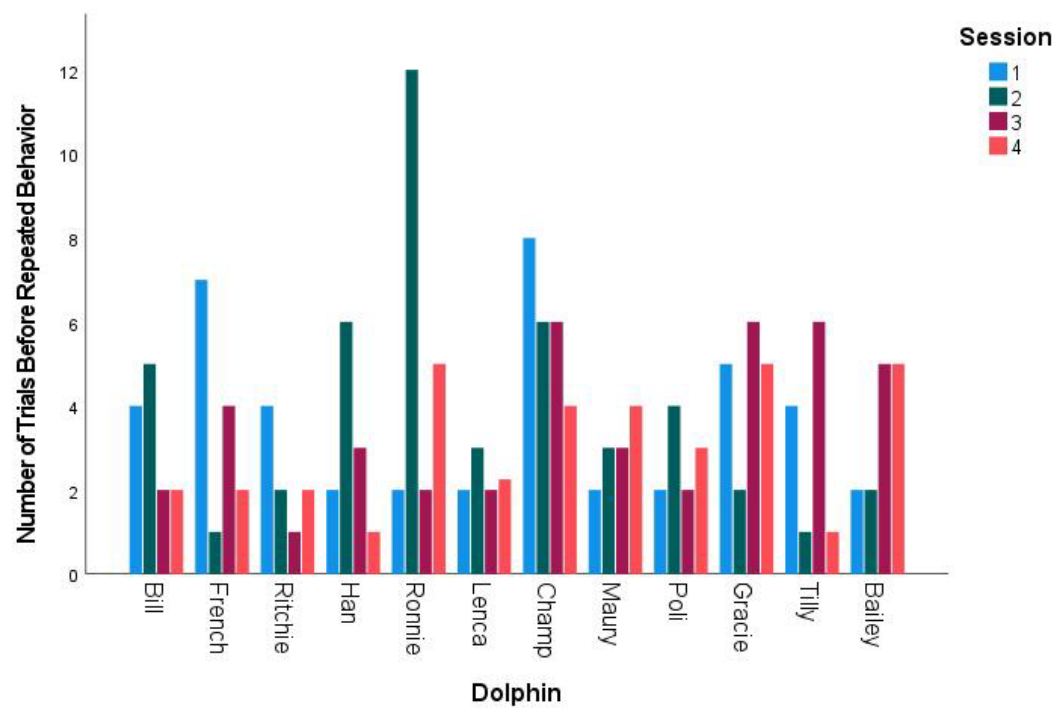

Flexibility

Figure S3. Mean Proportion of Behaviors Emitted per Flexibility Energy Category Per Dolphin.

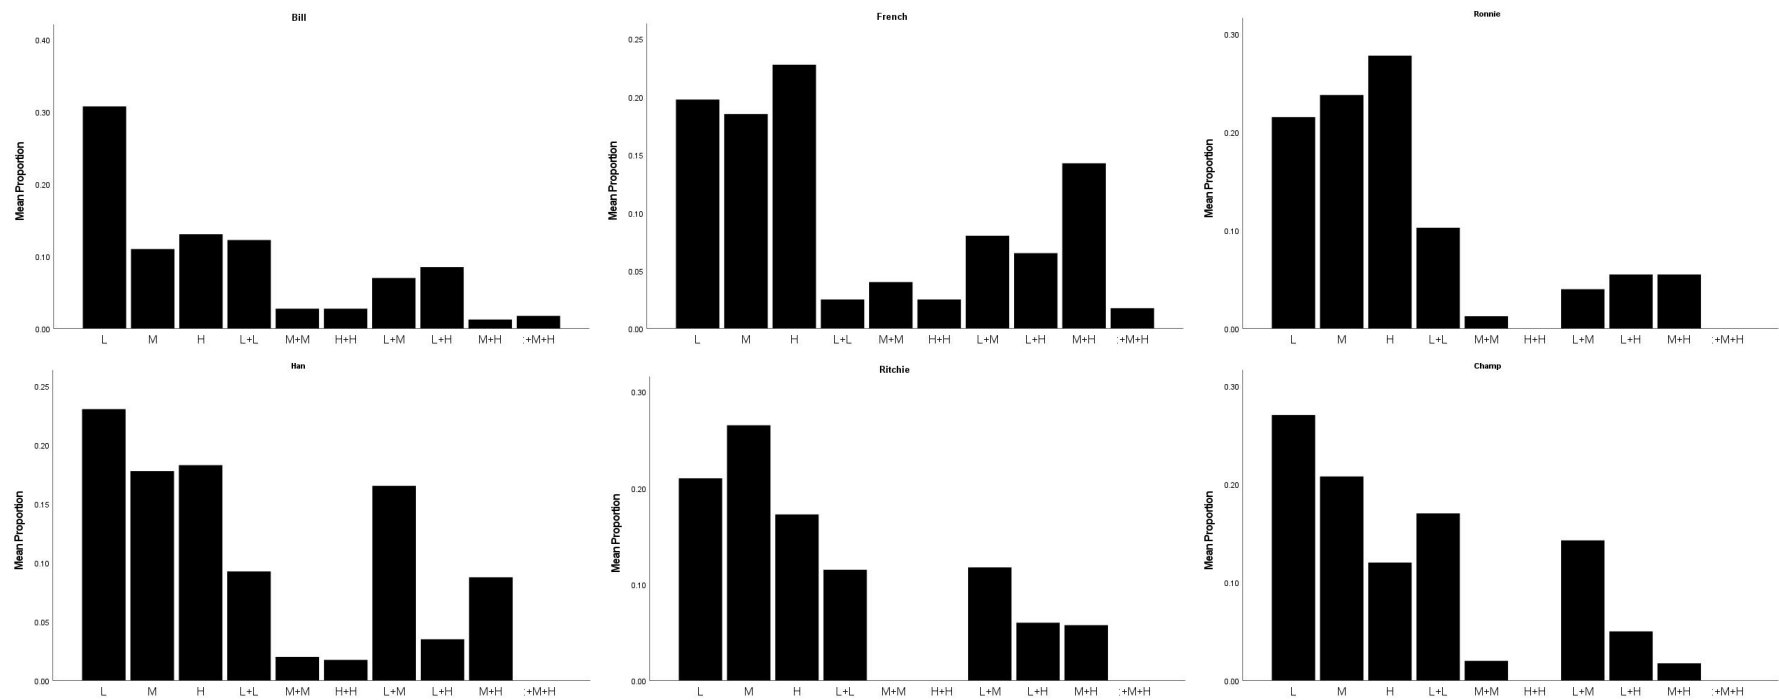

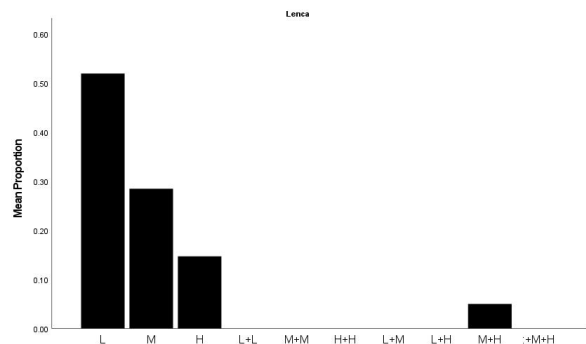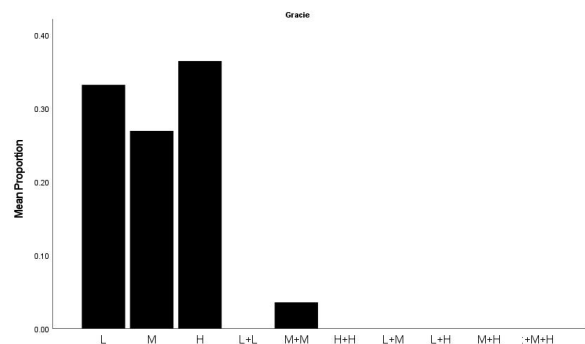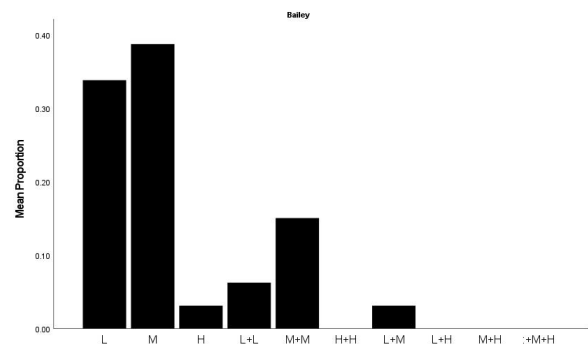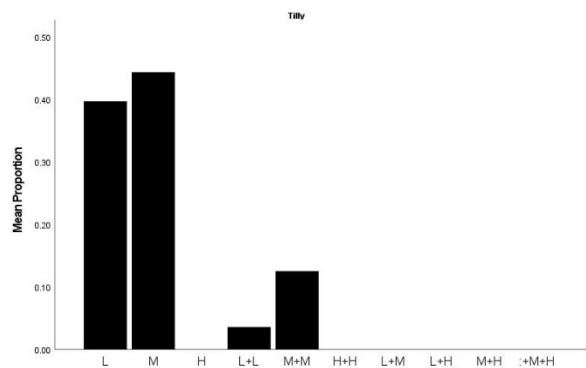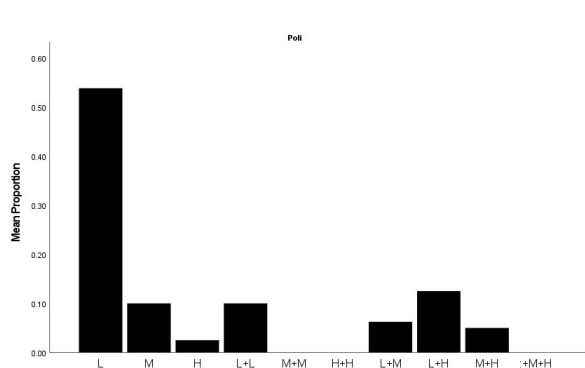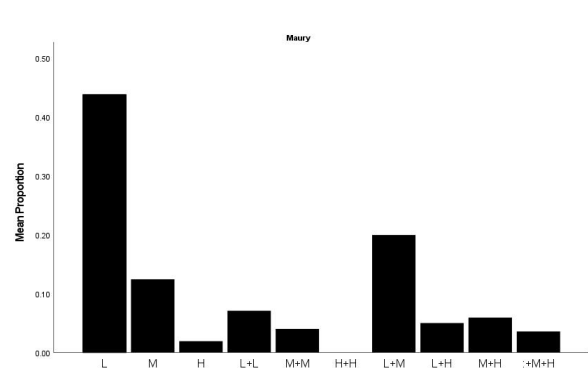

**Figure S4.** Mean Proportion of Behaviors Emitted per Flexibility Type Category Per Dolphin

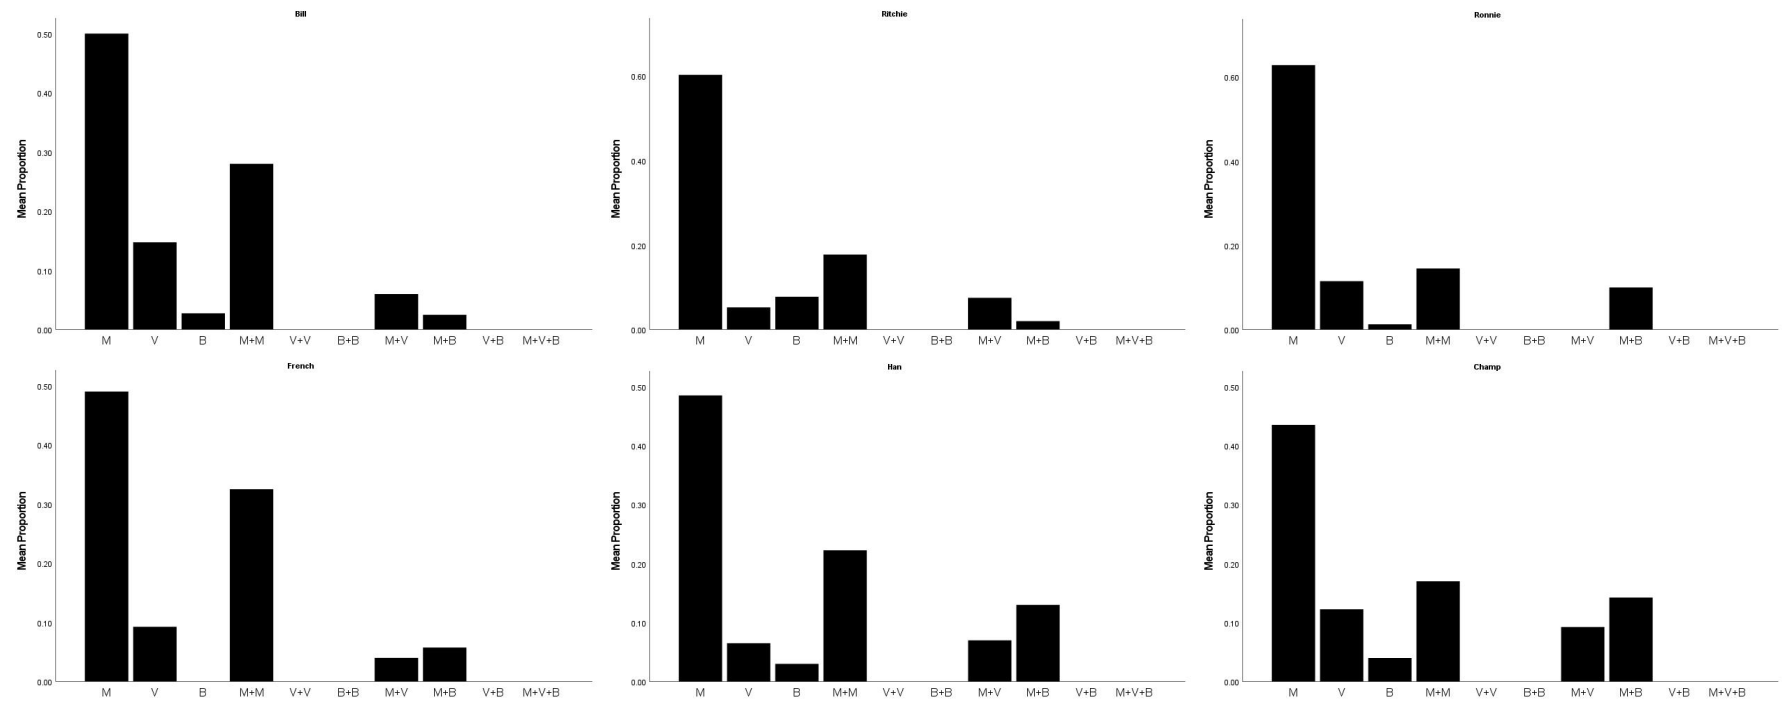

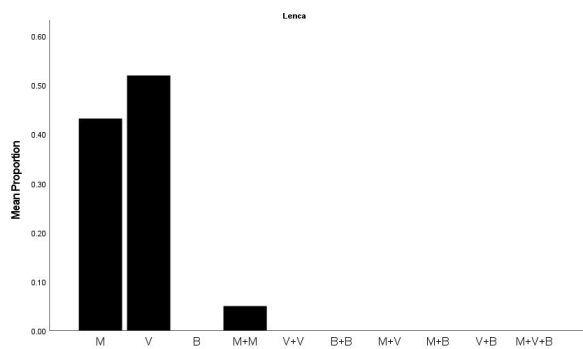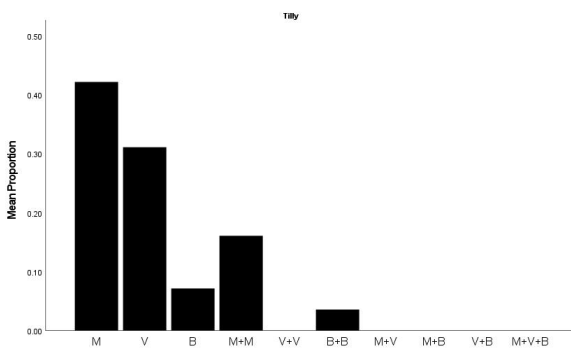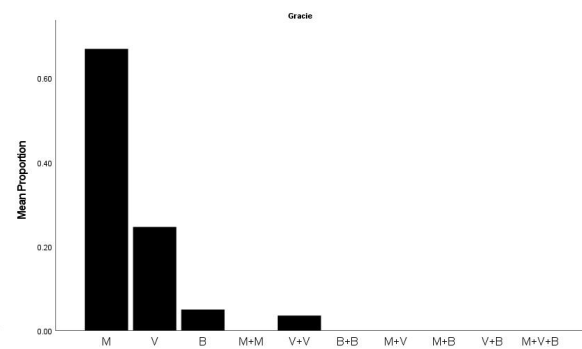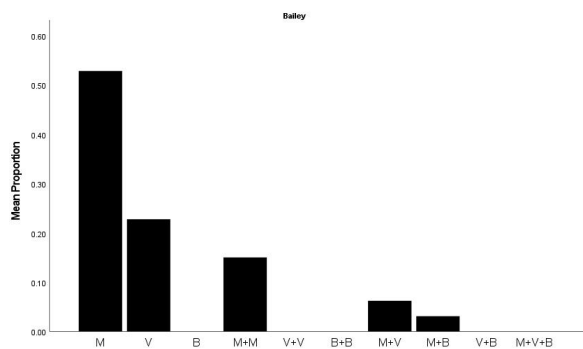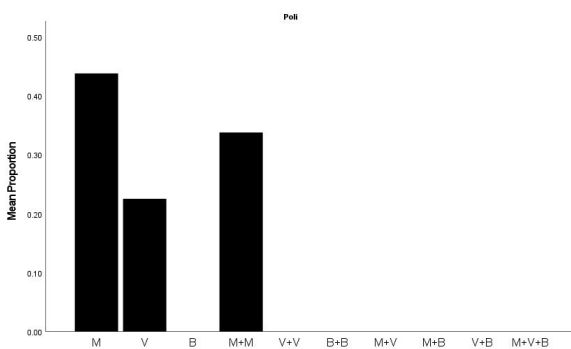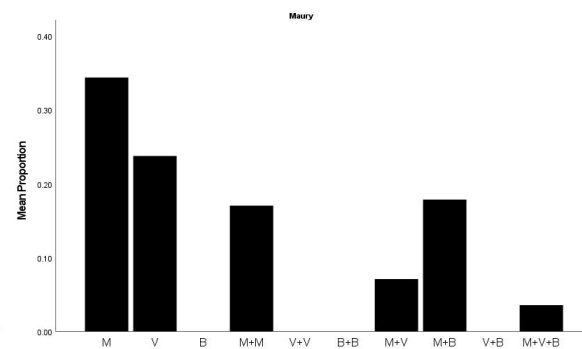

## Originality

**Figure S5.** Mean Number of Behaviors Emitted per Originality Category Per Dolphin.

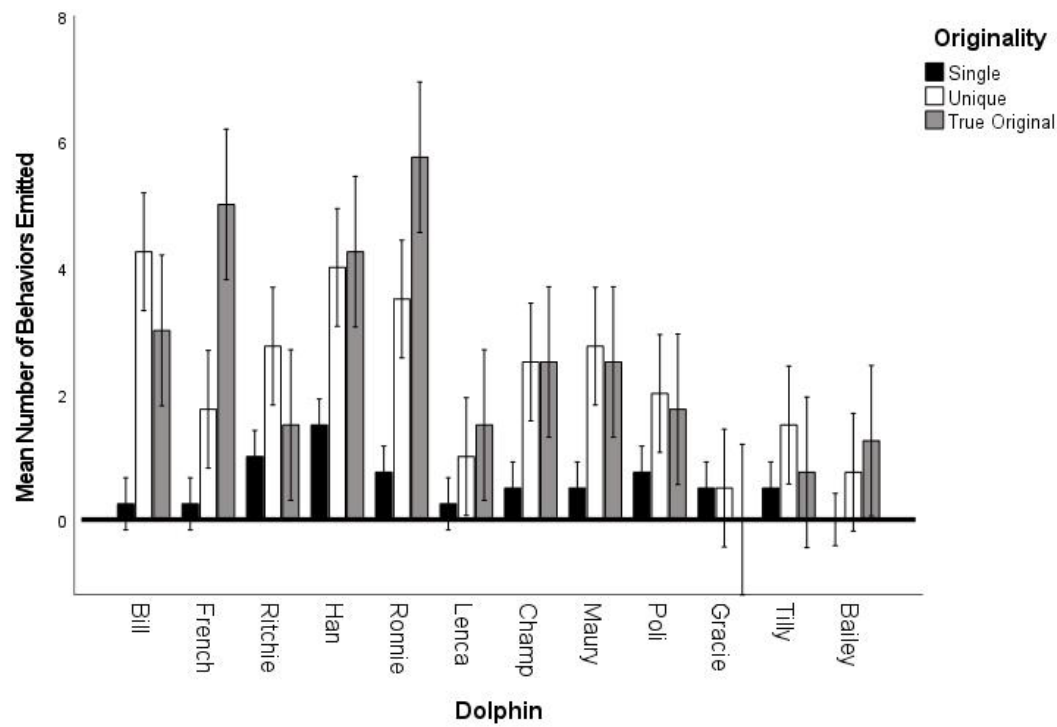

## Elaboration

**Figure S6.** Mean Proportion of Behaviors Emitted per Elaboration Category Per Dolphin.

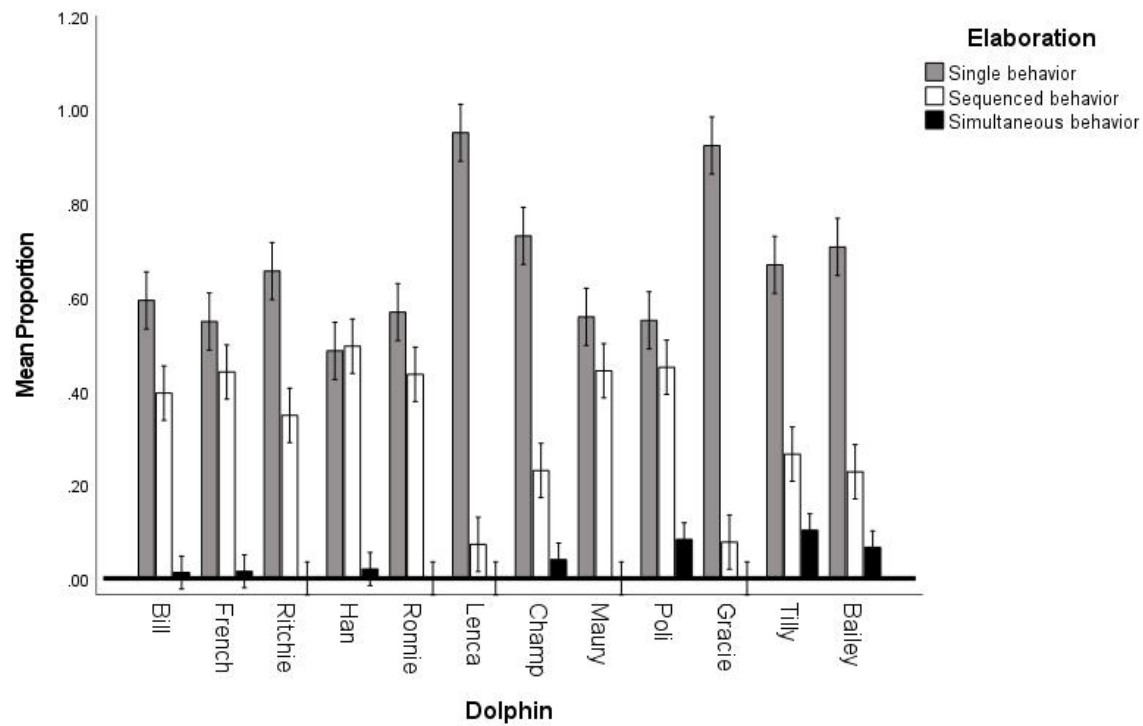

Supplement: s1 [file s1]
